# Supplementary material for: Controlled synthesis of lanthanide-doped Gd2O2S nanocrystals with novel excitation-dependent multicolor emissions
Source: Royal Society of Chemistry journal article supplement (doi:10.1039/c7nr00454k), 2017-01-01
Supplement: c7nr00454k1.pdf [file c7nr00454k1.pdf]

## Supporting Information

Controlled synthesis of lanthanide-doped  $\text{Gd}_2\text{O}_2\text{S}$  nanocrystals with a novel excitation -dependent multicolor emissions

Lei Lei,\* Shengjun Zhang, Han Xia, Ying Tian, Junjie Zhang, Shiqing Xu\*

College of Materials Science and Engineering, China Jiliang University, Hangzhou 310018, P. R. China

Table S1 and Figure S1-S14

Table S1 the detailed conditions for synthesizing  $\text{Gd}_2\text{O}_2\text{S}$  NCs with different morphologies

|                                 | A : B : C   | OA:OM:ODE | T[°C] | t[min] | Phase     | Morphology | Mean-size [nm] |
|---------------------------------|-------------|-----------|-------|--------|-----------|------------|----------------|
| $\text{Gd}_2\text{O}_2\text{S}$ | 0 : 0 : 10  | 1 : 3 : 4 | 315   | 60     | hexagonal | plate      | ~7 (D)         |
|                                 | 0 : 0 : 10  | 1 : 3 : 4 | 315   | 60     | hexagonal | plate      | ~11 (D)        |
|                                 | 5 : 1 : 10  | 1 : 3 : 4 | 315   | 60     | hexagonal | plate      | ~40 (D)        |
|                                 | 5 : 1 : 100 | 1 : 3 : 4 | 315   | 60     | hexagonal | flower     |                |

A : Na(acac), B : Y(acac)<sub>3</sub>, C : S, (D) : diameter

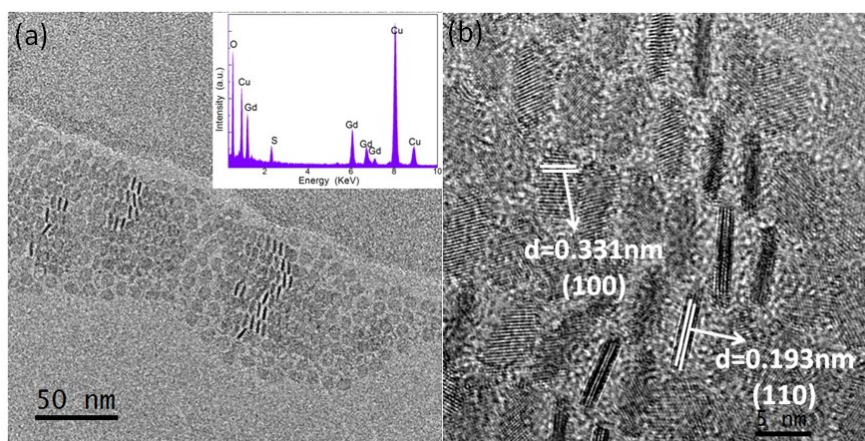

Figure S1 TEM (a) and HRTEM (b) images of  $\text{Gd}_2\text{O}_2\text{S}$  nanoplate with ~7nm in diameter. TEM specimens were dispersed in cyclohexane and ethanol mixture (cyclohexane : ethanol = 3:1) solution. Inset of (a) is the corresponding EDS spectra.

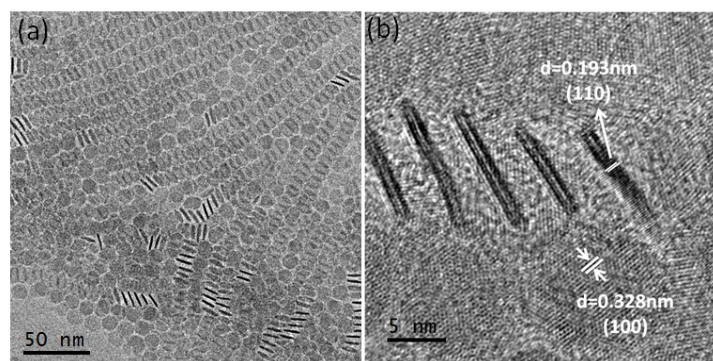

Figure S2 TEM and HRTEM images of  $\text{Gd}_2\text{O}_2\text{S}$  nanoplate prepared through taking the  $\text{Gd}_2\text{O}_2\text{S}$  nanoplate with  $\sim 7\text{nm}$  in diameter as seed. TEM specimens were dispersed in cyclohexane and ethanol mixture (cyclohexane : ethanol = 3:1) solution.

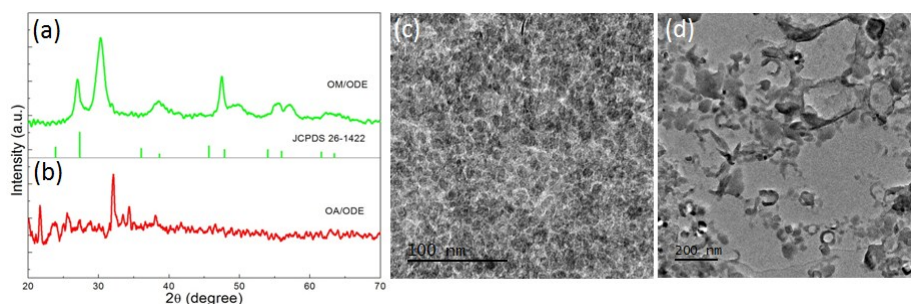

Figure S3 (a) XRD patterns of the products prepared under OM/ODE (a) and OA/ODE (b) solvent; (c) and (d) are the TEM images of (a) and (b).

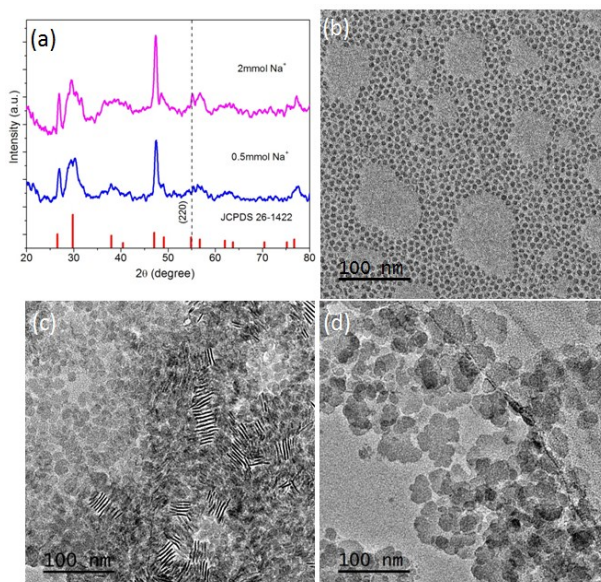

Figure S4 (a) XRD patterns of  $\text{Gd}_2\text{O}_2\text{S}$  NCs prepared with different  $\text{Na}^+$  concentration (0.5, 2 mmol), bars represent standard hexagonal  $\text{Gd}_2\text{O}_2\text{S}$  crystal (JCPSD 26-1422) data; TEM images of  $\text{Gd}_2\text{O}_2\text{S}$  NCs prepared with different  $\text{Na}^+$  concentration: (b) 0, (c) 0.5mmol, (d) 2mmol.

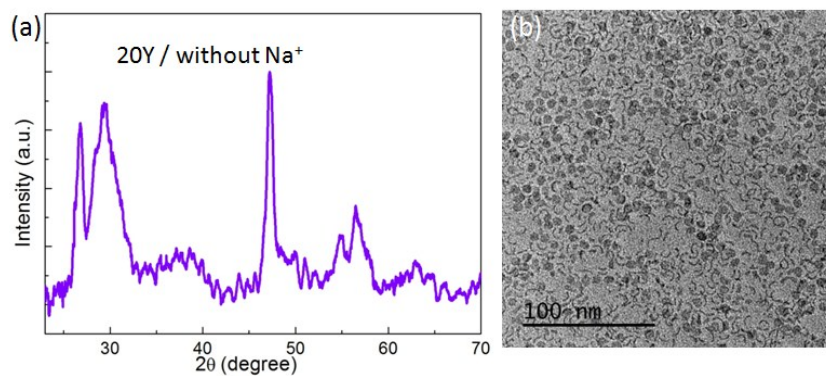

Figure S5 (a) XRD pattern of Gd<sub>2</sub>O<sub>2</sub>S NCs prepared with only doping Y<sup>3+</sup> ions (20 mmol%), (b) TEM image of the corresponding Gd<sub>2</sub>O<sub>2</sub>S NCs.

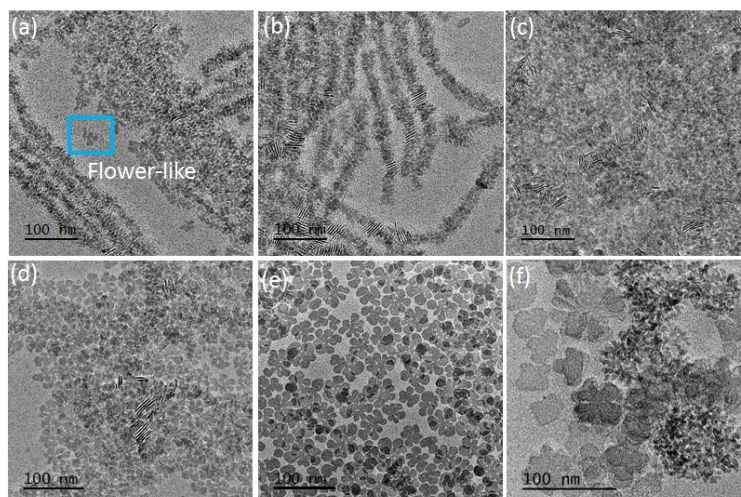

Figure S6 TEM images of the Gd<sub>2</sub>O<sub>2</sub>S NCs prepared under different reaction conditions: (a) 0min/315°C, (b) 2min/315°C, (c) 5min/315°C, (d) 10min/315°C, (e) 60min/315°C, (f) 60min/270°C.



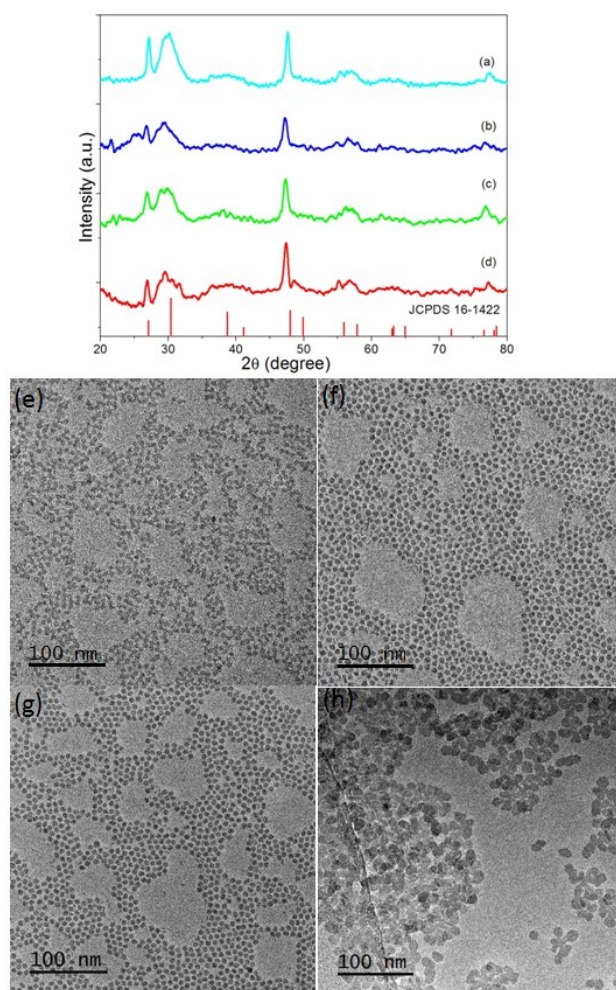

Figure S7 XRD patterns of  $\text{Gd}_2\text{O}_2\text{S}$  NCs prepared under different conditions: without  $\text{Y}^{3+}/\text{Na}^+$  and 1mmol S (a), 5 mmol S (b), 10 mmol S (c), with  $\text{Y}^{3+}/\text{Na}^+$  and 5mmol S (d); (e)-(h) are the corresponding TEM images of (a)-(d), respectively.

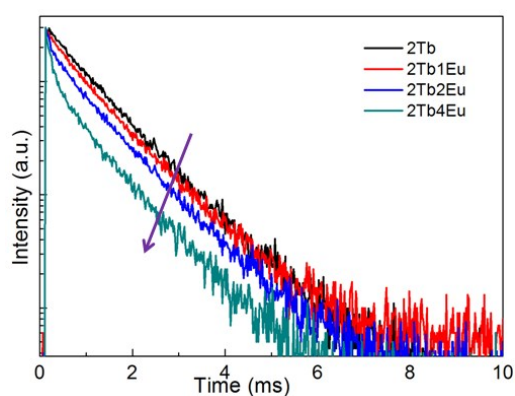

Figure S8 Decay curves of  $\text{Tb}^{3+}: ^5\text{D}_4$  level in F-NYG: 2%Tb/x%Eu (x=0, 1, 2, 4) samples.

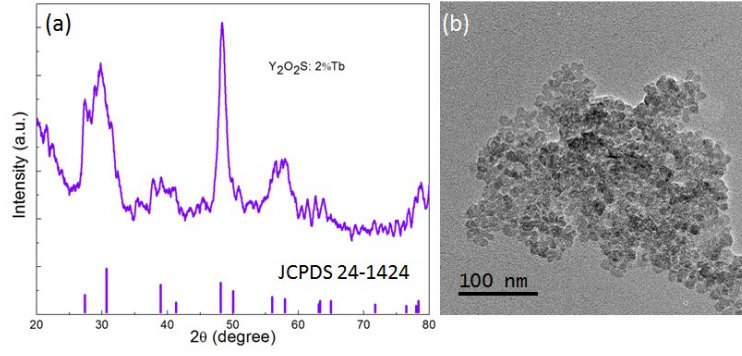

Figure S9 XRD pattern and TEM image of  $\text{Y}_2\text{O}_2\text{S}: 2\%\text{Tb}$  NCs.

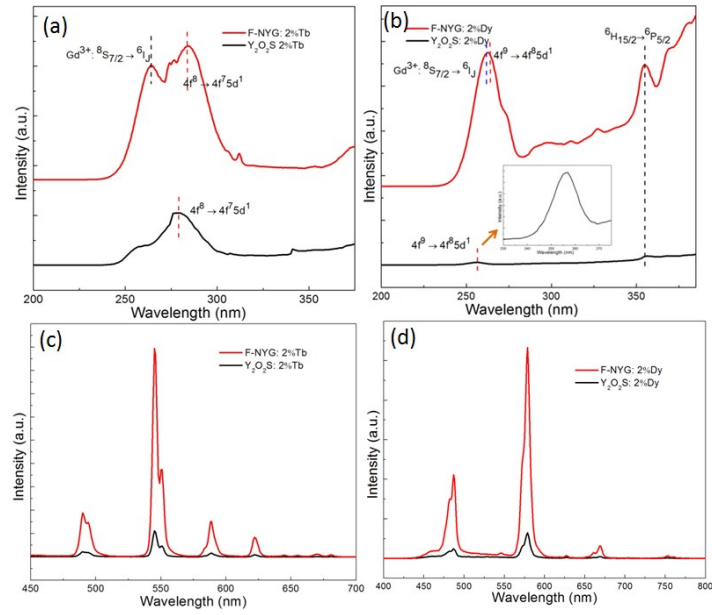

Figure S10 (a) and (b) are the PLE spectra of F-NYG: 2%Tb ( $\text{Y}_2\text{O}_2\text{S}: 2\%\text{Tb}$ ) and F-NYG: 2%Dy ( $\text{Y}_2\text{O}_2\text{S}: 2\%\text{Dy}$ ), respectively; (c) and (d) are the corresponding PL spectra.

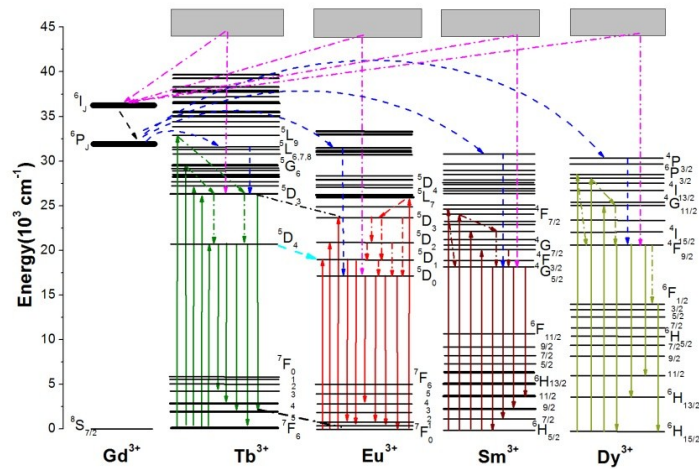

Figure S11 Schematic illustration of the energy transfer mechanism.

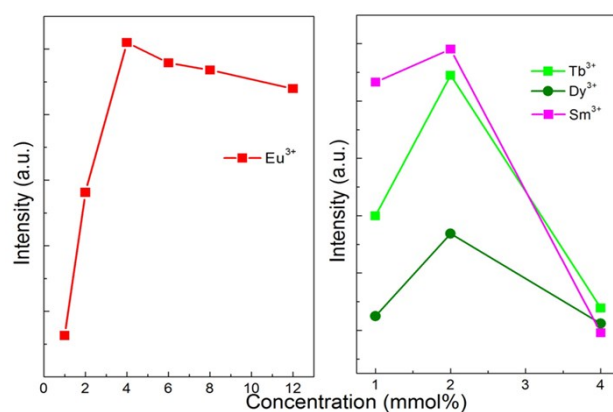

Figure S12 Dependence of the integral PL intensity on RE<sup>3+</sup> (RE = Eu, Tb, Dy, Sm) concentration in F-NYG NCs.

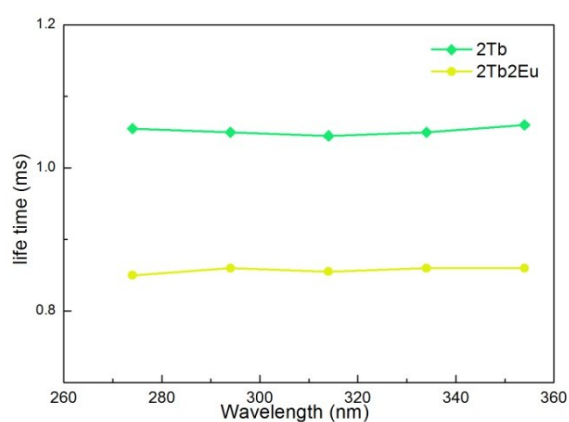

Figure S13 Life time of Tb<sup>3+</sup>: <sup>5</sup>D<sub>4</sub> level as a function of the excitation wavelength for F-NYG: 2%Tb and F-NYG: 2%Tb/2%Eu samples.

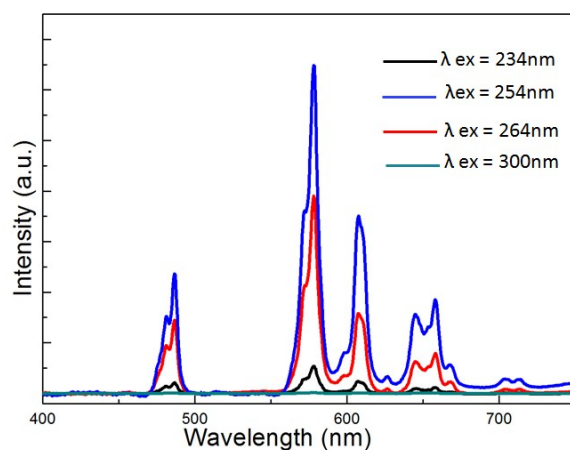

Figure S14 PL spectra of F-NYG: 1%Sm/2%Dy NCs under various excitation wavelengths.
